# Supplementary material
Source: Springer Nature journal article supplement (https://www.springermedizin.de/resource/supplementary/12947_2008_234_MOESM3_ESM.pdf/9556512)

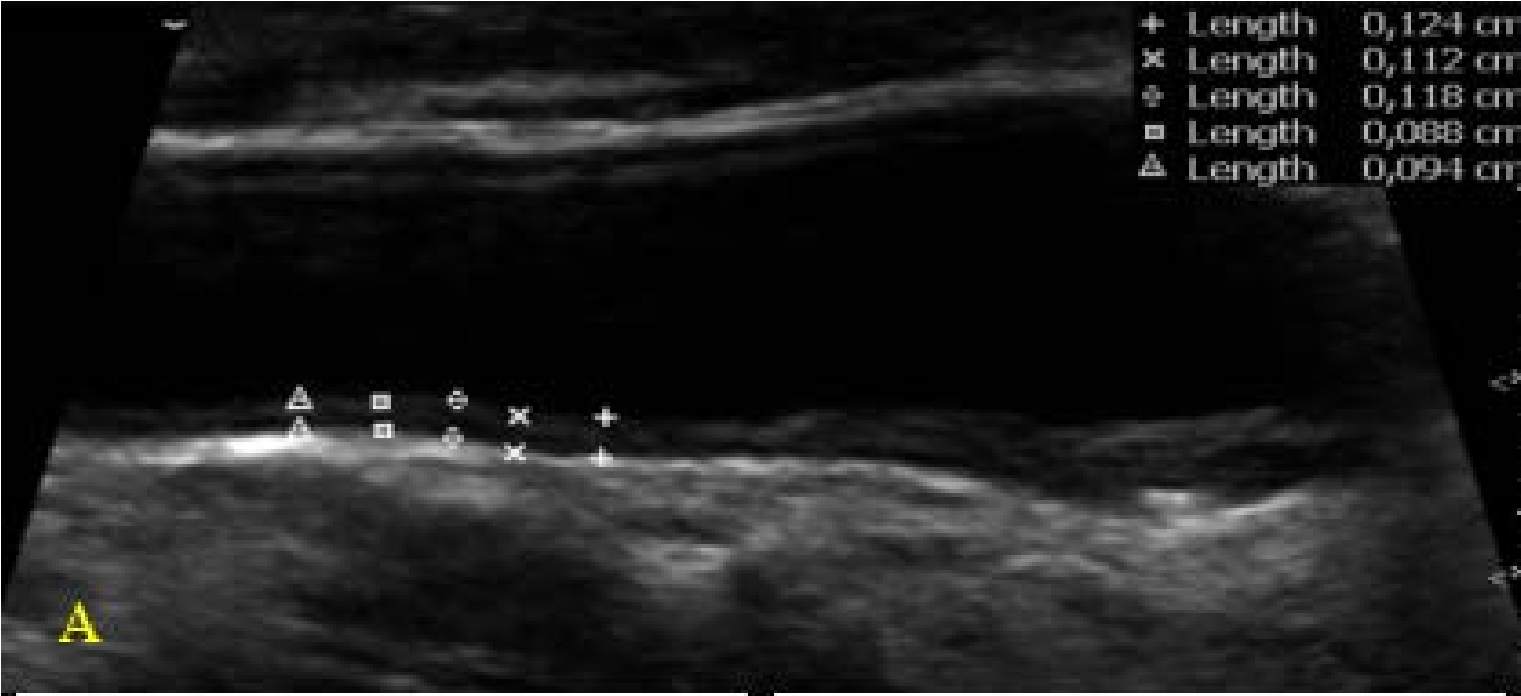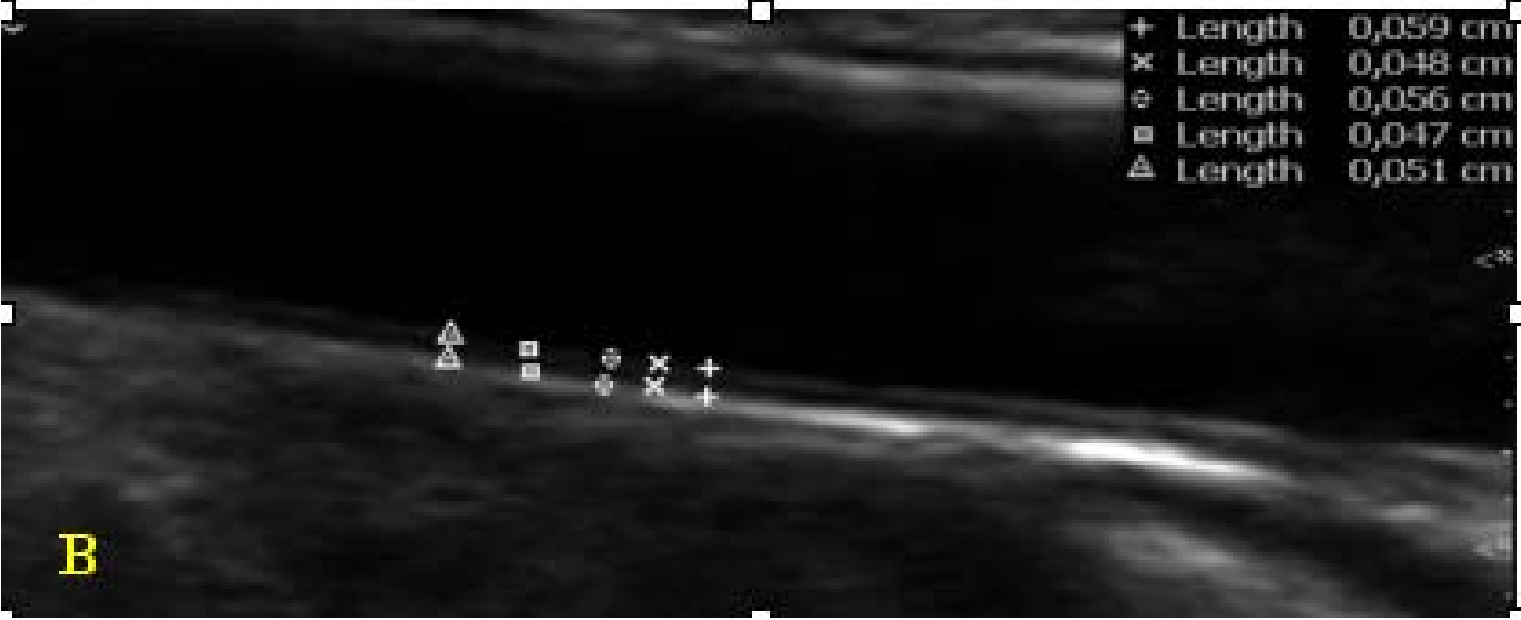

Supplement: MOESM3 [file 9556512]
